# Supplementary material for: The Proportion of Fermented Milk in Dehydrated Fermented Milk–Parboiled Wheat Composites Significantly Affects Their Composition, Pasting Behaviour, and Flow Properties on Reconstitution
Source: MDPI journal article supplement (doi:10.3390/foods7070113), 2018-07-14
Supplement: s1 [file s1]

# Supplementary Materials: The Proportion of Fermented Milk in Dehydrated Fermented Milk-Parboiled Wheat Composites Significantly Affects their Composition, Pasting Behaviour and Flow Properties on Reconstitution

Ashwini V. Shevade <sup>1</sup>, Yvonne C. O' Callaghan <sup>2</sup>, Nora M. O' Brien <sup>2</sup>, Tom P. O' Connor <sup>2</sup>, Timothy P. Guinee <sup>1,\*</sup>

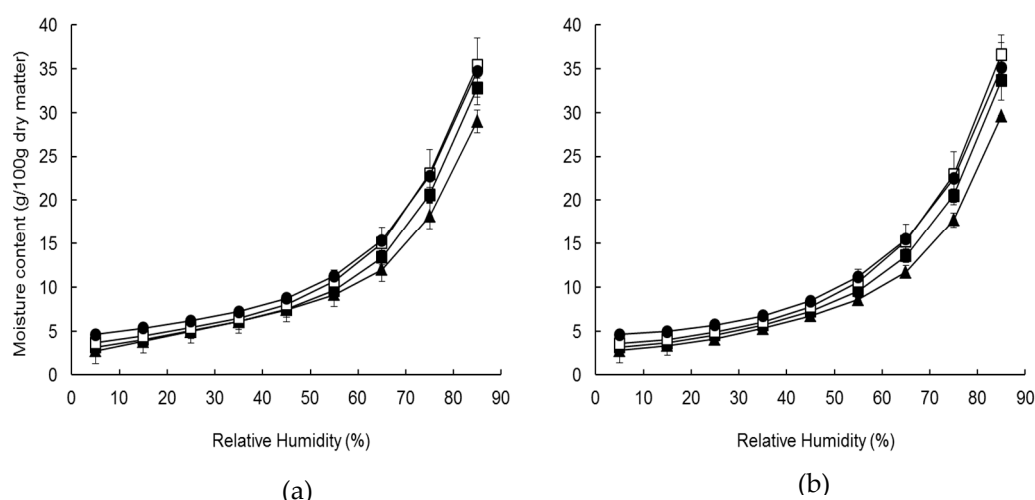

**Figure S1.** Sorption isotherms for salted dehydrated fermented milk-wheat composites (FMWC) during desorption (a) and adsorption (b): The ratio of fermented milk-to-wheat composites was 1.5(▲), 2.3 (■), 3.0 (□) or 4.0 (●). Presented values are the means of two replicate trials; error bars represent standard deviations of the mean.

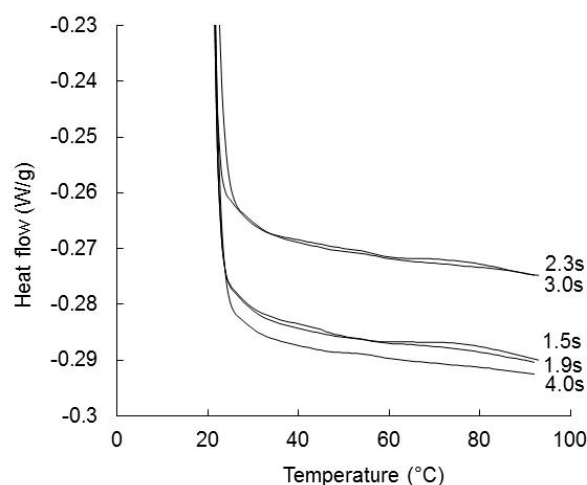

**Figure S2.** DSC endotherms for salted (s) dehydrated fermented milk-wheat composites (FMWC) with different ratios of fermented milk to wheat: 1.5, 1.9, 2.3, 3.0 or 4.0.

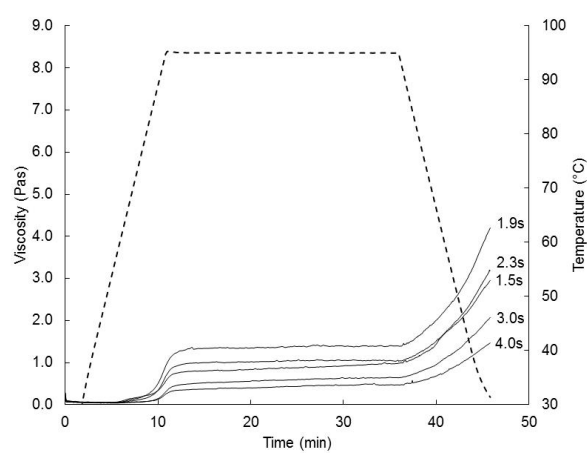

**Figure S3.** Pasting curves of salted (s) dehydrated fermented milk-wheat composites (FMWC) with different ratios of fermented milk to wheat: 1.5, 1.9, 2.3, 3.0 or 4.0.
